# Supplementary material
Source: PubMed Central journal article supplement (PMC4287380)
Supplement: NIHMS529804-supplement-1_si_001.pdf [file NIHMS529804-supplement-1_si_001.pdf]

## Supporting Information

### Antibacterial Activity of and Resistance to Small Molecule Inhibitors of the ClpP Peptidase

Short Title: ClpP Inhibition as an Anti-Tuberculosis Strategy

Corey L. Compton<sup>A</sup>, Karl R. Schmitz<sup>B</sup>, Robert T. Sauer<sup>B</sup>, and Jason K. Sello<sup>A</sup>

<sup>A</sup>Department of Chemistry, Brown University, 324 Brook Street, Providence, RI 02912; <sup>B</sup>Department of Biology, Massachusetts Institute of Technology, 77 Massachusetts Avenue, Cambridge, MA 02139

To whom correspondence may be addressed. E-mail: [jason\\_sello@brown.edu](mailto:jason_sello@brown.edu);  
Telephone: (401)863-1194.

## Synthesis

**General.** All reagents were purchased from Sigma-Aldrich or VWR. All synthesis reactions were monitored by thin layer chromatography using precoated silica gel 60 plates (particle size 0.040–0.063 mm). Column chromatography was performed using 60 Å (230–400 mesh ASTM) silica gel. NMR analyses were performed on a Bruker Advance Ultrashield Spectrometer (400 or 300 MHz). All spectra were referenced to residual solvent signals in CDCl<sub>3</sub> (7.24 ppm for <sup>1</sup>H, 77.0 ppm for <sup>13</sup>C.) Chemical shifts are reported on the δ scale and coupling constants J are in Hz. Multiplicities are described as s (singlet), d (doublet), dd (doublet of doublets), t (triplet), q (quartet), or m (multiplet).

**General Procedure for the Preparation of Thiol Esters.** A 100-mL round-bottomed flask equipped with a rubber septum was evacuated and put under a positive pressure of nitrogen, then, charged with 50 mL of methylene chloride, thiophenol (1 eq, 50 mmol) and pyridine (1 eq, 50 mmol) and cooled in an ice bath while an acyl chloride (1 eq, 50 mmol) was added by syringe over 5 min. The resulting suspension of white solid was stirred for an additional 5 min at 0 °C and at room temperature for 30 min and then poured into 100 mL of distilled H<sub>2</sub>O. The aqueous phase was separated and extracted with 25 mL of methylene chloride, and the combined organic phases were dried over Na<sub>2</sub>SO<sub>4</sub>, filtered, and concentrated. Flash chromatography on silica with a mobile phase of 15:1 Hex:EtOAc afforded the desired thiol ester.

### S-Phenyl heptanethioate

<sup>1</sup>H NMR (400 Mhz, CDCl<sub>3</sub>) 7.44 (s, 5H), 2.69 (t, 2H) 1.74 (quint, 2H), 1.3 (m, 6H), 0.93 (d, 3H) <sup>13</sup>C NMR (300 Mhz, CDCl<sub>3</sub>) 197.60, 134.48, 129.28, 129.14, 127.95, 43.74, 31.44, 28.64, 25.57, 22.46, 14.05 LRMS (FAB) 223 [M+H]<sup>+</sup>, 245 [M+Na]<sup>+</sup> HRMS (FAB) calculated [M+H]<sup>+</sup> 223.1157, found [M+H]<sup>+</sup> 223.1150; 92% yield

### S-Phenyl propanthioate

<sup>1</sup>H NMR (300 Mhz, CDCl<sub>3</sub>) 7.39 (s, 5H), 2.67-2.74 (q, 2H), 1.22-1.27 (t, 3H), <sup>13</sup>C NMR (400 Mhz, CDCl<sub>3</sub>) 198.32, 134.56, 129.34, 129.19, 127.85, 37.12, 9.65 LRMS (FAB) 167 [M+H]<sup>+</sup>, 189 [M+Na]<sup>+</sup> HRMS (FAB) calculated [M+Na]<sup>+</sup> 189.0350, found [M+Na]<sup>+</sup> 189.0352; 94% yield

### S-Phenyl nonanethioate

<sup>1</sup>H NMR (300 Mhz, CDCl<sub>3</sub>) 7.42-7.52 (s, 5H), 2.75-2.84 (t, 2H), 1.71-1.78 (m, 2H), 1.26-1.48 (m, 10H), 0.76 (t, 3H) <sup>13</sup>C NMR (400 Mhz, CDCl<sub>3</sub>) 197.61, 134.49, 129.29, 129.16, 127.96, 43.75, 31.82, 29.24, 29.11, 28.98, 25.62, 22.67, 14.13 LRMS (FAB) 251 [M+H]<sup>+</sup>, HRMS (FAB) calculated [M+H]<sup>+</sup> 251.1470, found [M+Na]<sup>+</sup> 251.1475; 97% yield

### S-phenyl undec-10-enethioate

<sup>1</sup>H NMR (400 Mhz, CDCl<sub>3</sub>) 7.44 (s, 5H), 5.83 (m, 1H) 4.95 (dd, 2H), 2.67 (t, 2H), 2.06 (q, 2H), 1.73 (quint, 2H), 1.32 (m, 10 H) <sup>13</sup>C NMR (400 Mhz, CDCl<sub>3</sub>) 197.57, 139.16,

134.49, 129.29, 129.16, 127.96, 114.20, 43.73, 33.81, 29.27, 29.21, 29.06, 28.95, 28.90, 25.60, LRMS (FAB) 278 [M+H]<sup>+</sup>, 300 [M+Na]<sup>+</sup>, HRMS (FAB) calculated [M+H]<sup>+</sup> 277.1626, found [M+H]<sup>+</sup> 277.1615; 86% yield from carboxylic acid

*S*-phenyl 3-phenylpropanethioate

<sup>1</sup>H NMR (400 Mhz, CDCl<sub>3</sub>) 7.23-7.44 (m, 10H), 3.00-3.05 (m, 4H) <sup>13</sup>C NMR (400 Mhz, CDCl<sub>3</sub>) 196.75, 139.94, 134.52, 129.46, 129.24, 128.60, 128.42, 127.63, 126.45, 45.17, 31.41 LRMS (FAB) 278 [M+H]<sup>+</sup>, 300 [M+Na]<sup>+</sup>, HRMS (FAB) calculated [M+H]<sup>+</sup> 277.1626, found [M+H]<sup>+</sup> 277.1615; 98% yield

**General Procedure for the Preparation of  $\beta$ -Lactones from Thiol Esters and Aldehydes.** A 100-mL round-bottomed flask equipped with a rubber septum was evacuated and put under a positive pressure of nitrogen. The flask was charged with 50 mL of dry THF and diisopropylamine (1.1 eq, 11 mmol), and then cooled in an dry ice and acetone bath (-78 °C) while *n*-butyllithium solution (2.25 M in hexanes, 1.035 eq, 10.35 mmol) was added via syringe over 2 min. After 30 min, thioester (1eq, 10.0 mmol) was added drop wise via syringe over 5 min. After 30 min, a solution of the aldehyde (1 eq, 10.0 mmol) in 12.5 mL of THF was added dropwise over 20 min via a syringe cooled externally with dry ice. The reaction mixture was stirred at -78 °C for 60 min and then allowed to warm to 0 °C over 120 min. Saturated NH<sub>4</sub>Cl solution (50 mL) was then added, and the resulting mixture was partitioned between 50 mL of water and 50 mL of diethyl ether. The organic phase was extracted with three 50-mL portions of 1N HCL, three 50-mL portions of sat. Na<sub>2</sub>CO<sub>3</sub> solution and two 50-mL portions of saturated NaCl solution, dried over NaSO<sub>4</sub>, filtered, and concentrated to afford a pale yellow oil. Flash column chromatography on silica gel (gradient elution with ethyl acetate: hexanes) gave single diastereomeric  $\beta$ -Lactones.

Figure 1,  $\beta$ -lactone 2 - Trans 4-butyl 3-pentyloxetan-2-one

<sup>1</sup>H NMR (400 Mhz, CDCl<sub>3</sub>) 4.2 (m, 1H), 3.1-3.2 (m, 1H), 1.8 (m, 2H), 1.6 (m, 2H), 1.4 (m, 2H), 1.34-1.49 (m, 6H), 1.02 (t, 3H), 0.94 (t, 3H); <sup>13</sup>C NMR (400 Mhz, CDCl<sub>3</sub>) 165.16, 82.91, 54.09, 32.31, 31.47, 28.17, 26.68, 22.34, 18.05, 16.99, 13.92 LRMS (FAB) 185 [M+H]<sup>+</sup>, 207 [M+Na]<sup>+</sup> HRMS (FAB) calculated 207.1361 [M+Na]<sup>+</sup>, found 207.1366 [M+Na]<sup>+</sup>; 28% yield

Figure 1,  $\beta$ -lactone 3 - Trans-4-butyl 3-heptyloxetan-2-one.

<sup>1</sup>H NMR (400 Mhz, CDCl<sub>3</sub>) 4.25 (m, 1H), 3.15 (m, 1H), 1.8-1.9 (m, 2H), 1.7-1.8 (m, 2H), 1.55-1.7 (m, 2H), 1.4-1.55 (m, 4H), 1.2-1.4 (m, 6H), 0.95-1.05 (t, 3H), 0.9-0.95 (t, 3H), <sup>13</sup>C NMR (400 Mhz, CDCl<sub>3</sub>) 171.70, 77.98, 56.16, 36.51, 36.44, 31.71, 29.25, 27.88, 27.01, 22.61, 18.45, 16.93, 13.89; LRMS (FAB) 212 [M+H]<sup>+</sup>, 235 [M+Na]<sup>+</sup> HRMS (FAB) calculated 235.1674 [M+Na]<sup>+</sup>, found 235.1680 [M+Na]<sup>+</sup>; 21% yield

Figure 1,  $\beta$ -lactone 4 - Trans-4-butyl-3-(non-8-en-1-yl)oxetan-2-one

<sup>1</sup>H NMR (400 Mhz, CDCl<sub>3</sub>) 5.7-5.8 (m, 1H), 4.9-5.0 (dd, 2H), 4.2 (m, 1H), 3.1 (m, 1H), 2.0 (m, 2H), 1.5-1.7 (m, 8H), 1.4-1.52 (m, 8H), 0.99-1.03 (t, 3H), <sup>13</sup>C NMR (400 Mhz,

CDCl<sub>3</sub>) 171.69, 139.08, 114.24, 77.98, 56.15, 36.51, 33.76, 29.24, 29.16, 28.96, 28.83, 27.87, 26.98, 18.46, 13.81; LRMS (FAB) 239 [M+H]<sup>+</sup>, 627 [M+Na]<sup>+</sup> HRMS (FAB) calculated 239.2011 [M+H]<sup>+</sup>, found 239.2018 [M+H]<sup>+</sup>; 18% yield

Figure 1,  $\beta$ -lactone 5 - Trans-4-isopropyl-3-methyloxetan-2-one

<sup>1</sup>H NMR (400 Mhz, CDCl<sub>3</sub>) 3.84-3.86 (dd, 1H), 3.22-3.31 (m, 1H), 1.45-1.48 (d, 3H), 1.10-1.13 (d, 3H), 0.93-1.01 (d, 3H), <sup>13</sup>C NMR (400 Mhz, CDCl<sub>3</sub>) 172.02, 84.25, 48.80, 32.40, 18.05, 16.78, 12.85 LRMS (FAB) 129 [M+H]<sup>+</sup>, 151 [M+Na]<sup>+</sup> HRMS (FAB) calculated 129.0916 [M+H]<sup>+</sup>, found 129.0919 [M+H]<sup>+</sup>; 23% yield

Figure 1,  $\beta$ -lactone 6 - Trans-4-isopropyl-3-pentyloxetan-2-one

<sup>1</sup>H NMR (400 Mhz, CDCl<sub>3</sub>) 3.94-4.16 (dd, 1H), 3.2-3.6 (m, 1H), 1.9 (m, 1H), 1.8 (m, 1H), 1.7 (m, 1H), 1.34 (m, 6H), 0.9-1.3 (m, 9H), <sup>13</sup>C NMR (400 Mhz, CDCl<sub>3</sub>) 171.69, 82.85, 54.10, 32.34, 31.49, 28.18, 26.71, 22.37, 18.10, 17.01, 13.97 LRMS (FAB) 185 [M+H]<sup>+</sup>, 207 [M+Na]<sup>+</sup> HRMS (FAB) calculated 207.1361 [M+Na]<sup>+</sup>, found 207.1366 [M+Na]<sup>+</sup>; 26% yield

Figure 1,  $\beta$ -lactone 7 - Trans-3-benzyl-4-propyloxetan-2-one

<sup>1</sup>H NMR (400 Mhz, CDCl<sub>3</sub>) 7.1-7.5 (m, 5H), 4.3-4.4 (m, 1H), 3.4-3.5 (m, 1H), 1.7-1.9 (m, 1H), 1.6-1.7 (m, 1H), 1.4-1.6 (m, 2H), 1.1-1.3 (m, 2H), 0.9 (t, 3H); <sup>13</sup>C NMR (400 Mhz, CDCl<sub>3</sub>) 170.87, 137.13, 128.89, 127.08, 126.33, 90.39, 57.27, 36.26, 33.75, 18.10, 13.70 LRMS (FAB) 204 [M+H]<sup>+</sup>, 227 [M+Na]<sup>+</sup> HRMS (FAB) calculated 227.1048 [M+Na]<sup>+</sup>, found 227.1053 [M+Na]<sup>+</sup>; 47% yield

Figure 1,  $\beta$ -lactone 8 - 4,4-Diethyl-4-methyloxetan-2-one

<sup>1</sup>H NMR (400 Mhz, CDCl<sub>3</sub>) 3.31-3.36 (q, 1H), 1.96-2.02 (m, 1H), 1.75-1.87 (m, 3H), 1.29-1.31 (d, 3H), 0.98-1.02 (t, 3H), 0.94-0.98 (t, 3H), <sup>13</sup>C NMR (400 Mhz, CDCl<sub>3</sub>) 172.64, 84.97, 51.38, 29.25, 24.53, 8.77, 8.03, 7.62 LRMS (FAB) 129 [M+H]<sup>+</sup> 151 [M+Na]<sup>+</sup> HRMS (FAB) calculated 129.0916 [M+H]<sup>+</sup>, found 129.0919 [M+H]<sup>+</sup>; 42% yield

Figure 1,  $\beta$ -lactone 9 - 4,4-Diethyl-4-pentyloxetan-2-one

<sup>1</sup>H NMR (400 Mhz, CDCl<sub>3</sub>) 3.15-3.20 (t, 1H), 2.00-2.04 (m, 1H), 1.73-1.83 (m, 7H), 1.32 (broad, 4H), 0.91-1.00 (t, 9H), <sup>13</sup>C NMR (400 Mhz, CDCl<sub>3</sub>) 172.25, 85.00, 56.98, 31.60, 29.26, 27.61, 24.48, 24.31, 22.36, 13.98, 8.20, 7.42 LRMS (FAB) 199 [M+H]<sup>+</sup> 221 [M+Na]<sup>+</sup> HRMS (FAB) calculated 221.1518 [M+Na]<sup>+</sup>, found 221.1520 [M+Na]<sup>+</sup>; 39% yield

Figure 1,  $\beta$ -lactone 10 - 4,4-Diethyl-3-(non-8-en-1-yl)oxetan-2-one

<sup>1</sup>H NMR (400 Mhz, CDCl<sub>3</sub>) 5.80(m, 1H), 4.95-5.04 (dd, 2H), 3.19 (t, 1H), 2.40-2.54 (m, 2H), 2.0-2.12 (m, 4H), 1.77 (m, 8H), 1.08-1.17 (m, 8H), 0.94-1.02 (t, 6H), <sup>13</sup>C NMR (400 Mhz, CDCl<sub>3</sub>) 172.24, 139.10, 114.22, 85.00, 56.97, 33.75, 29.39, 29.26, 29.15, 28.99, 28.84, 27.92, 24.48, 24.34, 8.20, 7.42 LRMS (FAB) 253 [M+H]<sup>+</sup>, 275 [M+Na]<sup>+</sup> HRMS (FAB) calculated 275.1987 [M+Na]<sup>+</sup>, found 275.1995 [M+Na]<sup>+</sup>; 34% yield

Figure 1,  $\beta$ -lactone 11 - 3-pentyl-1-oxaspiro[3.5]nonan-2-one

$^1\text{H}$  NMR (400 Mhz,  $\text{CDCl}_3$ ) 3.07 (t, 1H), 1.89-1.93 (m broad, 2H), 1.67 (m broad, 8H), 1.33 (m, 6H), 0.92 (t, 3H),  $^{13}\text{C}$  NMR (400 Mhz,  $\text{CDCl}_3$ ) 172.30, 82.163, 58.22, 37.43, 31.61, 31.25, 27.45, 24.96, 23.97, 22.91, 22.38, 22.17, 14.00 LRMS (FAB) 211  $[\text{M}+\text{H}]^+$ , 233  $[\text{M}+\text{Na}]^+$  HRMS (FAB) calculated 233.1518  $[\text{M}+\text{Na}]^+$ , found 233.1526  $[\text{M}+\text{Na}]^+$  56% yield

Figure 1,  $\beta$ -lactone 12 - 3-heptyl-1-oxaspiro[3.4]octan-2-one

$^1\text{H}$  NMR (400 Mhz,  $\text{CDCl}_3$ ) 3.40-3.48 (t, 1H), 2.55-2.58 (t, 1H), 2.42-2.45 (t, 1H), 2.23-2.26 (t, 1H), 1.86-1.95 (m broad, 4H), 1.60-1.63 (m broad, 2H), 1.29-1.32 (m, 8H) 0.88-0.92 (t, 3H),  $^{13}\text{C}$  NMR (400 Mhz,  $\text{CDCl}_3$ ) 172.08, 91.15, 54.80, 37.77, 34.45, 32.14, 31.74, 29.35, 27.38, 25.57, 23.49, 22.63, 20.36, 14.10 LRMS (FAB) 211  $[\text{M}+\text{H}]^+$ , 233  $[\text{M}+\text{Na}]^+$  HRMS (FAB) calculated 247.1674  $[\text{M}+\text{Na}]^+$ , found 247.1668  $[\text{M}+\text{Na}]^+$  48% yield

Chemical Proteomic Probe: Trans-3-benzyl-4-(pent-4-yl)oxetan-2-one

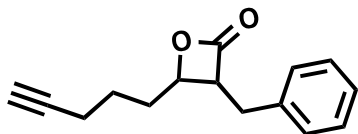

$^1\text{H}$  NMR (400 Mhz,  $\text{CDCl}_3$ ) 7.2-7.5 (m, 5H), 4.3-4.4 (m, 1H), 3.5-3.6 (m, 1H), 3.2 (m, 2H), 3.0 (s, 1H) 1.4-2.0 (m, 6H)  $^{13}\text{C}$  NMR (400 Mhz,  $\text{CDCl}_3$ ) 170.87, 137.13, 128.89, 127.08, 126.33, 90.39, 78.32, 68.67, 57.27, 36.26, 33.75, 20.70, 18.10, LRMS (FAB) 228  $[\text{M}+\text{H}]^+$ , 251  $[\text{M}+\text{Na}]^+$  HRMS (FAB) calculated 251.1048  $[\text{M}+\text{Na}]^+$ , found 251.1056  $[\text{M}+\text{Na}]^+$ ; 28% yield

**Preparation of (1*S*,5*R*)-5-methyl-6-oxabicyclo[3.2.0]heptan-7-one (Figure 1: Entry 13).** A 25-ml RBF equipped with a rubber septum was evacuated and placed under a positive pressure of nitrogen. To the flask was then added tosyl Chloride (1.1 eq, 1.1 mmol), 4-dimethylaminopyridine (1.5 eq, 1.5 mmol) and dichloromethane (4 mL). After the solid was dissolved, diisopropylamine (4 eq, 4 mmol) was added and allowed to stir for 10 min. Next, a solution of 6-ketoheptanoic acid (1 eq, 1 mmol) in 1 mL DCM was added drop wise. The solution was allowed to stir at RT for 1.5 h and then powdered anhydrous  $\text{K}_2\text{CO}_3$  (3 eq, 3 mmol) was added in one portion. The reaction slurry was allowed to stir at RT for 4 h and then diluted with hexanes and passed through a silica gel plug to remove excess solids. The solution was then dried with  $\text{Na}_2\text{SO}_4$  and concentrated *in vacuo*. The product was purified by flash chromatography ( $\text{SiO}_2$ , eluting with 20% EtOAc) to afford the  $\beta$ -lactone as a colorless liquid.

**Table S1. Strains used in this study**

| Strain                         | Description                                                                                                                                                                                                                     | Source/Reference |
|--------------------------------|---------------------------------------------------------------------------------------------------------------------------------------------------------------------------------------------------------------------------------|------------------|
| <i>Streptomyces coelicolor</i> |                                                                                                                                                                                                                                 |                  |
| M145                           | Prototroph SCP1-, SCP2-                                                                                                                                                                                                         |                  |
| B812                           | M145 $\Delta$ 2618-2619:: <i>apr</i>                                                                                                                                                                                            | This Study       |
| B834                           | M145 $\Delta$ 7281-7280:: <i>apr</i>                                                                                                                                                                                            | This Study       |
| B813                           | M145 $\Delta$ 2618-2619:: <i>apr</i> - <i>pJS372</i>                                                                                                                                                                            | This Study       |
| B835                           | M145 $\Delta$ 7281-7280:: <i>apr</i> - <i>pJS374</i>                                                                                                                                                                            | This Study       |
| <i>Escherichia coli</i>        |                                                                                                                                                                                                                                 |                  |
| DH5 $\alpha$                   | F <sup>-</sup> $\phi$ 80lacZ $\Delta$ M15 $\Delta$ (lacZYA-argF) U169 recA1 endA1 hsdR17 ( <i>r<sub>K</sub><sup>-</sup></i> <i>m<sub>K</sub><sup>-</sup></i> ) phoA supE44 thi-1 gyrA96 relA1 $\lambda$                         | Invitrogen       |
| ET12567                        | <i>dam, dcm, hsdS, cat, tet</i>                                                                                                                                                                                                 | 50               |
| BW25113                        | $\Delta$ ( <i>araD-araB</i> )567 $\Delta$ <i>lacZ</i> 4787:: <i>rrnB</i> -4) <i>lacI</i> p-4000( <i>lacI</i> <sup>Q</sup> ), $\lambda$ -, <i>rpoS</i> 369(Am), <i>rph</i> -1, $\Delta$ ( <i>rhaD-rhaB</i> )568, <i>hsdR</i> 514 | 50               |
| JK10                           | <i>clpP</i> :: <i>cat</i> , $\Delta$ <i>lon</i> , <i>slyD</i> :: <i>kan</i> , $\lambda$ DE3                                                                                                                                     | 13               |
| gKS112                         | JK10 <i>pKS215</i>                                                                                                                                                                                                              | This Study       |
| gKS113                         | JK10 <i>pKS216</i>                                                                                                                                                                                                              | This Study       |
| ER2566                         |                                                                                                                                                                                                                                 | NEB              |
| gKS037                         | ER2566 <i>pKS075</i>                                                                                                                                                                                                            | This Study       |
| <i>Mycobacterium</i>           |                                                                                                                                                                                                                                 |                  |
| <i>M. smegmatis</i> MC2155     |                                                                                                                                                                                                                                 | ATCC             |
| <i>M. tuberculosis</i> H37Rv   |                                                                                                                                                                                                                                 | Scott Franzblau  |

**Table S2. Plasmids used in this study.**

| Plasmid         | Description                                                                                   | Source/Reference                  |
|-----------------|-----------------------------------------------------------------------------------------------|-----------------------------------|
| <i>pIJ790</i>   | [ <i>oriR101</i> ], [ <i>repA101(ts)</i> ], <i>araBp-gambet-exo</i> , <i>Chl</i> <sup>R</sup> | 50                                |
| pUZ8002         | RP4 Derivative, <i>OriT</i> -, <i>Kan</i> <sup>R</sup>                                        | 50                                |
| PGem-T-Easy     | pUC-derived, <i>lacZ</i> , <i>Amp</i> <sup>R</sup>                                            | Promega                           |
| pMS81           | <i>OriT</i> , $\Phi$ BT1 <i>attB-int</i> , <i>Hyg</i> <sup>R</sup>                            | 37                                |
| pBlueScript KS+ | pUC <i>ori</i> , MCS, <i>Amp</i> <sup>R</sup>                                                 | Agilent Technologies (Stratagene) |
| pJS812          | StC49 $\Delta$ SCO2618-19:: <i>apr</i>                                                        | This Study                        |
| pJS833          | St5H1 $\Delta$ SCO720-81:: <i>apr</i>                                                         | This Study                        |

|         |                                                                                                                                                       |            |
|---------|-------------------------------------------------------------------------------------------------------------------------------------------------------|------------|
| pJS371  | 1904 bp <i>AleI</i> and <i>SacI</i> fragment from cosmid StC49 containing SCO2618-19 with 146 upstream bp in pBluescript KS+, <i>Amp</i> <sup>R</sup> | This Study |
| pJS372  | SCO2618-19 subcloned into PMS81 from pJS372 using <i>EcoRV</i> and <i>SpeI</i> , <i>Hyg</i> <sup>R</sup>                                              | This Study |
| PJS373  | 1806 bp <i>ScaI</i> and <i>SacI</i> fragment from cosmid StC49 containing SCO7280-81 with 340 upstream bp in pBluescript KS+, <i>Amp</i> <sup>R</sup> | This Study |
| PJS374  | SCO7280-81 subcloned into PMS81 from pJS373 using <i>EcoRV</i> and <i>SpeI</i> , <i>Hyg</i> <sup>R</sup>                                              | This Study |
| PJS375  | <i>clpP3</i> 5'RACE product of GSP2 and AAP cloned into pGEM-T Easy, <i>Amp</i> <sup>R</sup>                                                          | This Study |
| pET-21a | pBR322 <i>ori</i> , <i>lacI</i> , <i>Amp</i> <sup>R</sup>                                                                                             | EMD        |
| pKS075  | codons 62-425 of <i>E. coli</i> ClpX downstream of a hexahistidine tag and TEV protease site, in pET-21a                                              | This Study |
| pET-22b | pBR322 <i>ori</i> , <i>lacI</i> , <i>Amp</i> <sup>R</sup>                                                                                             |            |
| pKS215  | codons 7-200 of <i>M. tuberculosis</i> ClpP1 upstream of a hexahistidine tag in pET-22b                                                               | This Study |
| pKS216  | codons 13-214 of <i>M. tuberculosis</i> ClpP2 upstream of a hexahistidine tag in pET-22b                                                              | This Study |

**Table S3. Primers used in this study.**

| <b>Primer Name</b>         | <b>Application / Function</b>                                 | <b>Sequence</b>                                                           |
|----------------------------|---------------------------------------------------------------|---------------------------------------------------------------------------|
| SCO 2618 KO R              | PCR targeting/disruption of <i>clpP1clpP2</i>                 | CCGTGCCAAGGAGCGGCAGACGATAC<br>AGCCTCTTGCCTAACTAGTTGTAGGC<br>TGGAGCTGCTTC  |
| SCO 2619 KO F              | PCR targeting/disruption of <i>clpP1clpP2</i>                 | GAGTCCCGGAAAGCGGCTCCAGCCCCG<br>CAGGGAAACGTGACTAGTATTCGGGG<br>ATCCGTCGACC  |
| SCO 7280 KO R              | PCR targeting/disruption of <i>clpP3clpP4</i>                 | GGCGCCCCCGCACCGCGGGGACGCCGGC<br>CCGGCAGCTCAACTAGTTGTAGGCTGGA<br>GCTGCTTC  |
| SCO 7281 KO F              | PCR targeting/disruption of <i>clpP3clpP4</i>                 | CGGCCACGACCGGCCACGACTCGACAAGG<br>AGCGCCGATGACTAGTATTCGGGGATCC<br>GTCCGACC |
| SCO 2618 KO Det R          | Verification of <i>clpP1clpP2</i> replacement with <i>apr</i> | CGCGTTAGGGTCCATGAATA                                                      |
| SCO 2619 KO Det F          | Verification of <i>clpP1clpP2</i> replacement with <i>apr</i> | CTCCTGGTGCTGCCTTATGT                                                      |
| SCO 7281 KO Det F          | Verification of <i>clpP3clpP4</i> replacement with <i>apr</i> | GGCAGAGAAGTCCCCTGTC                                                       |
| SCO 7280 KO Det R          | Verification of <i>clpP3clpP4</i> replacement with <i>apr</i> | CTGGTCCGGCTCACCTC                                                         |
| <i>clpP1clpP2</i> RT-PCR F | Detection of <i>clpP1clpP2</i> replacement with <i>apr</i>    | CACAGCTGCTGCTCCTTG                                                        |
| <i>clpP1clpP2</i> RT-PCR R | Detection of <i>clpP1clpP2</i> replacement with <i>apr</i>    | GTCCGATGAGGCCGTA                                                          |
| <i>clpP3clpP4</i> RT-PCR F | Detection of <i>clpP3clpP4</i> replacement with <i>apr</i>    | GCCAGGGAGTACGGAATG                                                        |
| <i>clpP3clpP4</i> RT-PCR R | Detection of <i>clpP3clpP4</i> replacement with <i>apr</i>    | TCTCCTTGGCCTGGAGTG                                                        |
| <i>hrdB</i> RT-PCR F       | Detection of <i>hrdB</i> transcript                           | CTCGAGGAAGAGGGTGTGAC                                                      |
| <i>hrdB</i> RT-PCR R       | Detection of <i>hrdB</i> transcript                           | TGCCGATCTGCTTGAGGTAG                                                      |
| GSP2                       | <i>clpP3</i> 5' RACE                                          | CGCGGGTCCTGTGCG                                                           |
| GSP1                       | <i>clpP3</i> 5' RACE                                          | CCGCGTGCACGGAGC                                                           |



|                    |                                                      |                                    |
|--------------------|------------------------------------------------------|------------------------------------|
| MtbClpP1M7_NdeI_F  | PCR of ClpP1 from <i>M. tuberculosis</i> genomic DNA | GAATGCCATATGCGTTCGAACTCGCAG        |
| MtbClpP1_NotI_R    | PCR of ClpP1 from <i>M. tuberculosis</i> genomic DNA | GCATTCGCGGCCGCTGTGCTTCTCCATTGAC    |
| MtbClpP2R13_NdeI_F | PCR of ClpP2 from <i>M. tuberculosis</i> genomic DNA | GAATGCCATATGCGCTACATCCTGCCGTCG     |
| MtbClpP2_NotI_R    | PCR of ClpP2 from <i>M. tuberculosis</i> genomic DNA | GCATTCGCGGCCGCGGCGGTTTGC GCGGA GAG |

**Table S4. Proteins Identified by Mass Spectrometry from *S. coelicolor* M145**

| Accession #              | Protein name                                                                     | Protein Score | Unique PSMs |
|--------------------------|----------------------------------------------------------------------------------|---------------|-------------|
| 21224335 ref NP_630114.1 | aconitate hydratase [Streptomyces coelicolor A3(2)]                              | 958.48        | 18          |
| 21221742 ref NP_627521.1 | delta-aminolevulinic acid dehydratase [Streptomyces coelicolor A3(2)]            | 145.90        | 2           |
| 21221075 ref NP_626854.1 | ATP-dependent Clp protease proteolytic subunit 1 [Streptomyces coelicolor A3(2)] | 104.61        | 2           |
| 21221076 ref NP_626855.1 | ATP-dependent Clp protease proteolytic subunit 2 [Streptomyces coelicolor A3(2)] | 246.76        | 4           |
| 21220139 ref NP_625918.1 | 20S proteasome alpha-subunit [Streptomyces coelicolor A3(2)]                     | 48.23         | 1           |
| 21220023 ref NP_625802.1 | pyridoxal biosynthesis lyase, PdxS [Streptomyces coelicolor A3(2)]               | 391.30        | 8           |
| 21221616 ref NP_627395.1 | molybdenum cofactor biosynthesis protein, MoaC [Streptomyces coelicolor A3(2)]   | 68.27         | 1           |
| 21223433 ref NP_629212.1 | GTP-dependent nucleic acid-binding protein, EngD [Streptomyces coelicolor A3(2)] | 288.23        | 6           |

**Table S5. Proteins Identified by Mass Spectrometry from *M. smegmatis* MC1255**

| Accession #                  | Protein name                                                               | Protein Score | Unique PSMs |
|------------------------------|----------------------------------------------------------------------------|---------------|-------------|
| 500047791 ref WP_011728509.1 | beta-lactamase [Mycobacterium smegmatis]                                   | 59.97         | 1           |
| 489989095 ref WP_003892152.1 | ATP-dependent chaperone protein, ClpB [Mycobacterium smegmatis]            | 37.38         | 1           |
| 504690048 ref WP_014877150.1 | D-alanyl-D-alanine carboxypeptidase [Mycobacterium smegmatis]              | 104.44        | 1           |
| 500051709 ref WP_011731626.1 | leucyl-tRNA synthetase [Mycobacterium smegmatis]                           | 71.98         | 1           |
| 504691119 ref WP_014878221.1 | malate dehydrogenase [Mycobacterium smegmatis]                             | 112.26        | 2           |
| 440625868 gb ELQ87711.1      | ATP-dependent Clp protease proteolytic subunit 1 [Mycobacterium smegmatis] | 50.69         | 1           |
| 440625869 gb ELQ87712.1      | ATP-dependent Clp protease proteolytic subunit 2 [Mycobacterium smegmatis] | 47.84         | 1           |
| 500050671 ref WP_011730588.1 | purine biosynthesis protein, purH [Mycobacterium smegmatis]                | 55.90         | 1           |
| 489992290 ref WP_003895347.1 | prokaryotic ubiquitin-like protein, Pup [Mycobacterium smegmatis]          | 55.76         | 1           |
| 489990142 ref WP_003893199.1 | thiosulfate sulfurtransferase [Mycobacterium smegmatis]                    | 40.95         | 1           |
| 500048252 ref WP_011728970.1 | tryptophan synthase subunit beta [Mycobacterium smegmatis]                 | 35.62         | 1           |
| 500047086 ref WP_011727804.1 | tryptophanyl-tRNA synthetase [Mycobacterium smegmatis]                     | 51.56         | 1           |
| 489992288 ref WP_003895345.1 | proteasome subunit alpha [Mycobacterium smegmatis]                         | 43.62         | 1           |

**Construction of *clpP1clpP2* and *clpP3clpP4* null mutants.** Strains of *S. coelicolor* in which either the *clpP1clpP2* locus (SCO2618-19) or the *clpP3clpP4* locus (SCO7280-81) was replaced with an apramycin (*apr*) resistance cassette were constructed via polymerase chain reaction (PCR)-targeted mutagenesis (50). The *apr* resistance cassette for replacement of *clpP1clpP2* was prepared using PCR primers SCO2618 KO FOR and SCO2619 KO REV and the Expand High Fidelity DNA polymerase (Roche). The *apr* resistance cassette for replacement of *clpP3clpP4* was prepared using the Expand High Fidelity polymerase (Roche) and PCR primers SCO7280 KO FOR and SCO781 KO REV. (Table S3). The resistance cassettes were introduced individually into *E. coli* BW25113/pIJ790 containing the appropriate WT (StC49 or St5H1) cosmid. Arabinose was added to induce expression of the  $\lambda$  RED recombinase. The resulting recombinant cosmids, StC49  $\Delta$ SCO2618-19::*apr* (pJS812) and St5H1  $\Delta$ SCO720-81::*apr* (pJS834), were transformed into ET12576/pUZ8002, a non-methylating strain of *E. coli*, and introduced into wild-type *S. coelicolor* M145 through conjugation as previously described (37), yielding *S. coelicolor* B812 and B834, respectively. Double cross-over exconjugants were selected by apramycin resistance and kanamycin sensitivity. The disruption of SCO2618-19 and SCO7280-81 was confirmed via PCR on isolated genomic DNA from *S. coelicolor* using the appropriate KO Det primers (Table S3).

**Complementation of *clpP1clpP2* and *clpP3clpP4* null strains.** A 1,940-bp fragment was excised from cosmid StC49 containing the SCO2618-19 ORF and 146 bp upstream of the SCO2618 translational start site by restriction digestion with *AleI* and *SacI*. The fragment was treated with DNA polymerase I Large (Klenow) Fragment (New England Biolabs). The blunt-ended fragment was then ligated into the *SmaI* site of pBluescript KS+ to yield pJS371. The fragment containing the SCO2618-19 locus was excised and ligated into pMS81 using *EcoRV* and *SpeI* restriction digestion to yield pJS372. pMS81 is a site-specific integrating vector that inserts into the  $\Phi$ BT1 *attB* site of *S. coelicolor* (50). pJS372 was transformed into ET12576/pUZ8002 and introduced into *S. coelicolor* via conjugation, yielding *S. coelicolor*  $\Delta$ SCO2618-19::*apr* pJS372 (37). Ex-conjugants were selected based on hygromycin resistance.

A 1,806-bp fragment was excised from cosmid St5H1 containing the SCO7280-81 ORF and 340 bp upstream of the SCO7280 translational start site by restriction digestion with *ScaI* and *SacI*. The fragment was treated with DNA polymerase I, Large (Klenow) Fragment (New England Biolabs). The blunt-ended fragment was then ligated into the *SmaI* site of pBluescript KS+ to yield pJS373. The fragment containing the SCO7280-81 locus was excised and ligated into pMS81 using *EcoRV* and *SpeI* restriction digestion to yield pJS374. pJS374 was transformed into ET12576/pUZ8002 and introduced into *S. coelicolor* via conjugation, yielding *S. coelicolor*  $\Delta$ SCO7280-81::*apr* pJS374 (37). Ex-conjugants were selected based on hygromycin resistance.

**Mapping the *clpP3/4* transcription start site via 5' RACE.** The transcriptional start site of the *clpP3/4* locus was identified with the 5' RACE System for Rapid Amplification of cDNA Ends, Version 2.0 (Invitrogen). To map the transcription start

site, total RNA was isolated as previously described from an NMMP culture of wild-type *S. coelicolor* M145 containing 50 µg/mL β-lactone to elevate the levels of the *clpP3clpP4* transcript. First strand cDNA synthesis was performed with 30 pmol of primer *GSP1* and 1.2 µg of RNA template according to the manufacturer's protocol for transcripts with high GC content. Following the first strand cDNA synthesis, the reaction was treated with RNase and S.N.A.P. purified. The purified first strand cDNA was treated with terminal deoxynucleotidyl transferase (Tdt) to append a 3'-oligo-dC tail according to the manufacturer's protocol. A 5 µl aliquot of the crude TDT reaction was then used as a template in a Taq polymerase PCR reaction with primer *GSP2* and the Abridged Anchor Primer (AAP, supplied with the kit). The resulting PCR product was ligated into vector pGEmT EASY (Invitrogen) resulting in pJS375, and introduced into *E. coli* strain DH5a. Several pJS375 plasmids containing the transcriptional start site of *clpP3clpP4* operon were isolated and sequenced.

**Figure S1. *S. coelicolor* morphological differentiation**

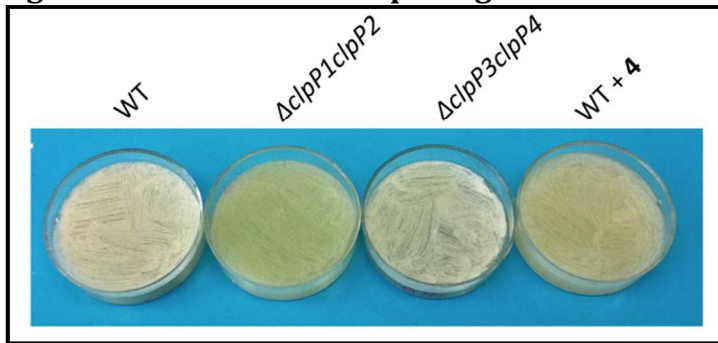

Morphological differentiation phenotypes of *S. coelicolor* M145 WT,  $\Delta clpP1clpP2$ ,  $\Delta clpP3clpP4$ , and WT treated with β-lactone 4 at 200 µg/mL. Image taken after 48 h on SFM media.
